# Supplementary material for: Sea Anemone Kunitz-Type Peptides Demonstrate Neuroprotective Activity in the 6-Hydroxydopamine Induced Neurotoxicity Model
Source: MDPI journal article supplement (doi:10.3390/biomedicines9030283), 2021-03-10
Supplement: s1 [file s1]

a

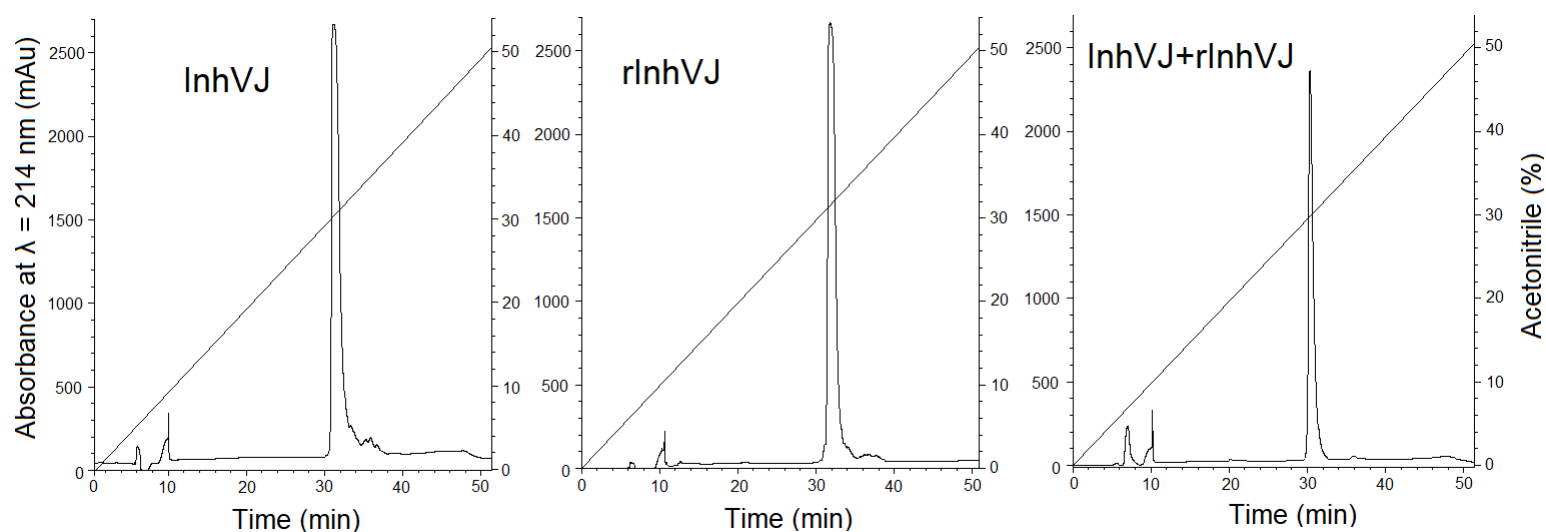

b

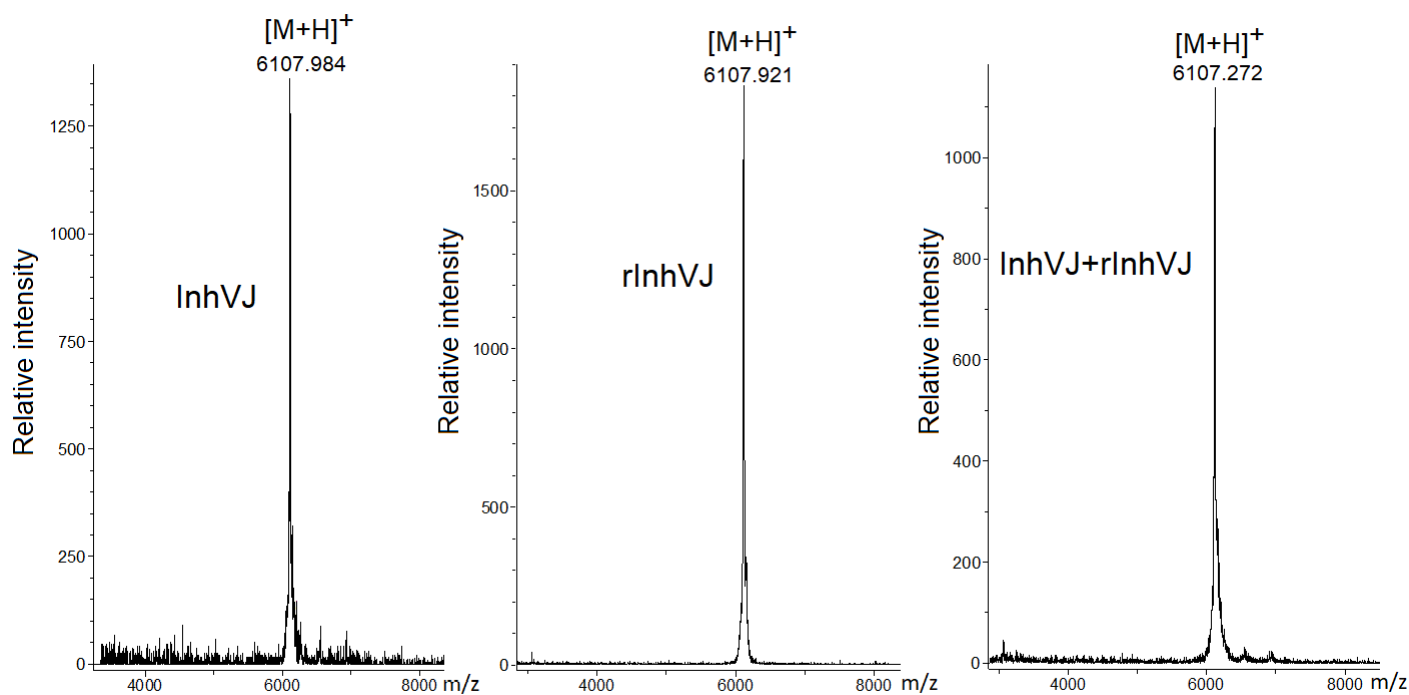

Figure S1 – (a) Elution profile of native InhVJ, recombinant InhVJ (rInhVJ) and their mix on Nucleosil C<sub>18</sub> column (Sigma Aldrich, USA) in a linear gradient of buffer B (0–50%) at a flow rate of 0.5 ml/min for 50 min. (b) Mass spectra of native InhVJ, recombinant InhVJ (rInhVJ) and their mix.

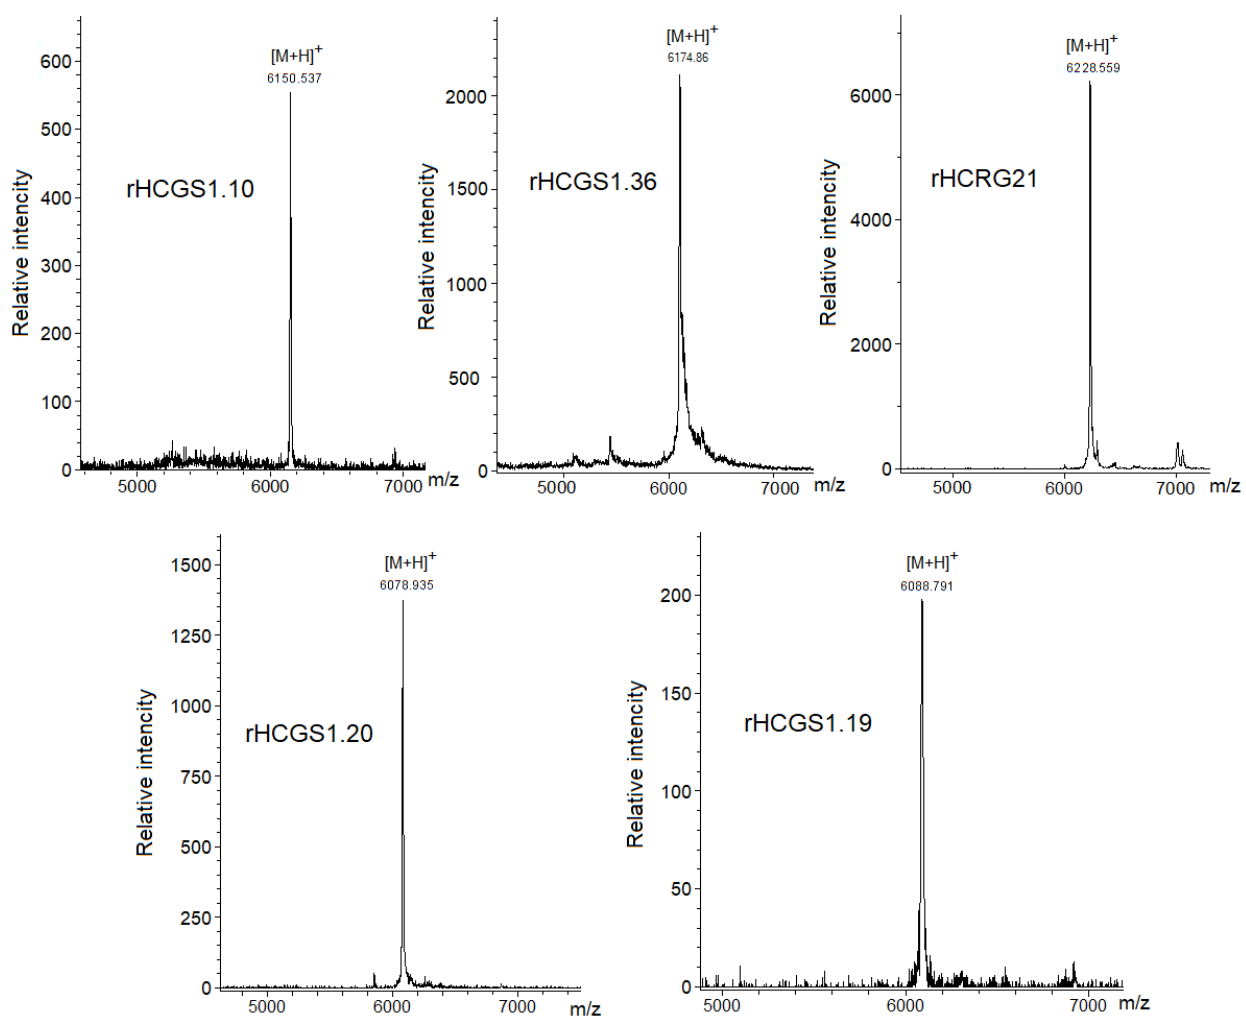

Figure S2 – Mass spectra of recombinant Kunitz-type peptides.
